# Supplementary material for: Decision Maker based on Nanoscale Photo-excitation Transfer
Source: PubMed Central journal article supplement — Sci Rep. 2013 Aug 9;3:2370. doi: 10.1038/srep02370 (PMC3738946; doi:10.1038/srep02370), 2013-08-09
Supplement: srep02370-s1.pdf [file srep02370-s1.pdf]

# Supplementary Information for ‘Decision Maker Based on Nanoscale Photo-excitation Transfer’

Song-Ju Kim,<sup>1†</sup> Makoto Naruse,<sup>2</sup> Masashi Aono,<sup>3</sup>  
Motoichi Ohtsu<sup>4</sup> and Masahiko Hara<sup>5</sup>

<sup>1</sup> WPI Center for Materials Nanoarchitectonics (MANA),  
National Institute for Materials Science (NIMS),  
1-1 Namiki, Tsukuba, Ibaraki 305-0044, Japan

<sup>2</sup> Photonic Network Research Institute,  
National Institute of Information and Communications Technology,  
4-2-1 Nukui-kita, Koganei, Tokyo 184-8795, Japan

<sup>3</sup> Earth-Life Science Institute, Tokyo Institute of Technology,  
2-12-1 Ookayama, Meguro-ku, Tokyo 152-8550, Japan

<sup>4</sup> Department of Electrical Engineering and Information Systems  
/ Nanophotonics Research Center, Graduate School of Engineering,  
The University of Tokyo, 2-11-16 Yayoi, Bunkyo-ku, Tokyo 113-8656, Japan

<sup>5</sup> Department of Electronic Chemistry,  
Interdisciplinary Graduate School of Science and Engineering,  
Tokyo Institute of Technology,  
4259 Nagatsuta, Midori-ku, Yokohama 226-8503, Japan

†KIM.Songju@nims.go.jp

# 1 Excitation Transfer Mediated by Optical Near-field Interactions

The interaction Hamiltonian between an electron and an electric field is given by

$$\hat{H}_{int} = - \int \hat{\psi}^\dagger(\vec{r}) \vec{\mu} \hat{\psi}(\vec{r}) \cdot \hat{\vec{D}}(\vec{r}) d\vec{r}, \quad (1)$$

where  $\vec{\mu}$  is the dipole moment,  $\hat{\psi}^\dagger(\vec{r})$  and  $\hat{\psi}(\vec{r})$  are respectively the creation and annihilation operators of an electron at  $\vec{r}$ , and  $\hat{\vec{D}}(\vec{r})$  is the operator of electric flux density. In usual light-matter interactions, the operator  $\hat{\vec{D}}(\vec{r})$  is a constant because the electric field of propagating light is considered to be constant on the nanometer scale. Therefore, one can derive optical selection rules by calculating the transfer matrix of an electric dipole. Consequently, in the case of cubic quantum dots, transitions to states described by quantum numbers containing an even number are prohibited. On the other hand, in the case of optical near-field interactions, there is a steep electric gradient of optical near-fields in the vicinity of nanometer-scale matter, and this facilitates optical transitions that violate conventional optical selection rules. Such an energy transfer to a conventionally dipole-forbidden energy level cannot be explained by carrier tunnelling [1, 2, 3] or dipole interactions [4, 5].

Optical excitations in nanostructures, such as quantum dots, can be transferred to neighbouring structures via optical near-field interactions [6]. Assume that two cubic quantum dots  $\mathbf{QD}_S$  and  $\mathbf{QD}_M$ , whose side lengths are  $a$  and  $\sqrt{2}a$ , respectively, are located close to each other [Fig. 1(a)]. Suppose that the energy eigenvalues for the quantised exciton energy level specified by quantum numbers  $(n_x, n_y, n_z)$  in the QD with side length  $a$  ( $\mathbf{QD}_S$ ) are given by

$$E_{(n_x, n_y, n_z)} = E_B + \frac{\hbar^2 \pi^2}{2Ma^2} (n_x^2 + n_y^2 + n_z^2), \quad (2)$$

where  $E_B$  is the energy of the bulk exciton and  $M$  is the effective mass of the exciton. According to eq. (2), there exists a resonance between the level of quantum number  $(1, 1, 1)$  for  $\mathbf{QD}_S$  [denoted as  $S_1$  in Fig. 1(a)] and  $(2, 1, 1)$  for  $\mathbf{QD}_M$  ( $M_2$ ). An optical near-field interaction, denoted as  $U_{S_1 M_2}$ , results from the steep gradient of the electric field in the vicinity of  $\mathbf{QD}_S$ . It is known that the inter-dot optical near-field interaction is given by a Yukawa-type potential denoted by

$$U(r) = A \exp(-r/a)/r, \quad (3)$$

where  $r$  is the inter-dot distance, and  $A$  and  $a$  are constants [6]. Therefore, excitons in  $\mathbf{QD}_S$  can move to the  $(2, 1, 1)$ -level in  $\mathbf{QD}_M$ . Note that an optical excitation of

the (2, 1, 1)-level in  $\mathbf{QD}_M$  corresponds to an electric dipole-forbidden transition. However, the optical near-field allows this level to be populated because of the steep electric field in the vicinity of the  $\mathbf{QD}_S$ . In  $\mathbf{QD}_M$ , the exciton sees a sublevel energy relaxation, denoted by  $\Gamma$ , which is faster than the near-field interaction, and so the exciton goes to the (1, 1, 1)-level of  $\mathbf{QD}_M$  ( $M_1$ ).

In the optical excitation transfer discussed above, the energy dissipation occurring in the destination quantum dot,  $\mathbf{QD}_M$ , determines the uni-directionality of signal transfer [7]. Therefore, when the lower energy level of the destination quantum dot is filled with another excitation (called “state-filling”), the optical excitation occurring in a smaller QD cannot move to a larger one. As a result, the optical excitation will go back and forth between these dots (optical nutation).

This suggests that the flow of optical excitation can be controlled differently in systems composed of multiple quantum dots by inducing state-filling therein. For example, Fig. 1(b) schematically represents a system consisting of five QDs denoted as  $\mathbf{QD}_{LL}$ ,  $\mathbf{QD}_{ML}$ ,  $\mathbf{QD}_S$ ,  $\mathbf{QD}_{MR}$  and  $\mathbf{QD}_{LR}$ . The sizes of  $\mathbf{QD}_S$ ,  $\mathbf{QD}_{Mi}$  ( $i = L, R$ ) and  $\mathbf{QD}_{Li}$  ( $i = L, R$ ) are respectively given by  $a$ ,  $\sqrt{2}a$  and  $2a$ . The energy levels in the system are summarised as follows.

| Energy Level | QD                 | Designation |
|--------------|--------------------|-------------|
| (1,1,1)      | $\mathbf{QD}_{ML}$ | $ML_1$      |
|              | $\mathbf{QD}_{MR}$ | $MR_1$      |
|              | $\mathbf{QD}_{LL}$ | $LL_1$      |
|              | $\mathbf{QD}_{LR}$ | $LR_1$      |
| (2,1,1)      | $\mathbf{QD}_{ML}$ | $ML_2$      |
|              | $\mathbf{QD}_{MR}$ | $MR_2$      |
|              | $\mathbf{QD}_{LL}$ | $LL_2$      |
|              | $\mathbf{QD}_{LR}$ | $LR_2$      |
| (2,2,2)      | $\mathbf{QD}_{LL}$ | $LL_3$      |
|              | $\mathbf{QD}_{LR}$ | $LR_3$      |

In such a system, the optical near-field interactions, shown schematically in Fig. 1(b), are as follows ( $i = L, R$ ).

|                   |                                                                                                           |
|-------------------|-----------------------------------------------------------------------------------------------------------|
| $U_{S_1 M i_2}$   | Between (1, 1, 1)-level of $\mathbf{QD}_S$ ( $S_1$ ) and (2, 1, 1)-level of $\mathbf{QD}_{M i_2}$         |
| $U_{S_1 L i_3}$   | Between (1, 1, 1)-level of $\mathbf{QD}_S$ ( $S_1$ ) and (2, 2, 2)-level of $\mathbf{QD}_{L i_3}$         |
| $U_{M i_1 L i_2}$ | Between (1, 1, 1)-level of $\mathbf{QD}_{M i_1}$ ( $M i_1$ ) and (2, 1, 1)-level of $\mathbf{QD}_{L i_2}$ |
| $U_{M i_2 L i_3}$ | Between (2, 1, 1)-level of $\mathbf{QD}_{M i_2}$ ( $M i_2$ ) and (2, 2, 2)-level of $\mathbf{QD}_{L i_3}$ |

Through these interactions, an optical excitation generated at  $\mathbf{QD}_S$  is transferred to the lowest energy levels in the largest-size QD, namely the energy level

$LL_1$  or  $LR_1$ . However, when  $LL_1$  and  $LR_1$  are occupied by other excitations, the input excitation generated at  $S_1$  should be relaxed from the middle-sized QD, that is,  $ML_1$  and  $MR_1$ . The idea of the QD-based decision maker is to induce state-filling at  $LL_1$  and/or  $LR_1$  while observing radiations from  $ML_1$  and  $MR_1$ . In Sec. 2, we describe the detailed dynamics of such a system.

## 2 Dynamics of Excitation Transfer in a Five Quantum Dot System

Here we analyse the dynamic behaviour of the system based on a density matrix formalism assuming optical near-field interactions between these five dots. For simplicity, we assume one excitation system. There are in total 11 energy levels in the system:  $S_1$  in  $\mathbf{QD}_S$ ;  $ML_1$  and  $ML_2$  in  $\mathbf{QD}_{ML}$ ;  $LL_1$ ,  $LL_2$  and  $LL_3$  in  $\mathbf{QD}_{LL}$ ;  $MR_1$  and  $MR_2$  in  $\mathbf{QD}_{MR}$ ;  $LR_1$ ,  $LR_2$  and  $LR_3$  in  $\mathbf{QD}_{LR}$ . Therefore, the number of different states occupying these energy levels is 12 including the vacancy state, as schematically shown in Fig. 1(c).

The optical near-field interaction between energy levels  $E_1$  and  $E_2$  is represented by  $U_{E_1E_2}$ ; for instance, the interaction between the (1, 1, 1)-level of  $\mathbf{QD}_S$  ( $S_1$ ) and the (2, 1, 1)-level of  $\mathbf{QD}_{ML}$  ( $ML_2$ ) is denoted by  $U_{S_1ML_2}$ . The radiative relaxation rates from  $S_1$ ,  $Mi_1$ , and  $Li_1$  are given by  $\gamma_{S_1}$ ,  $\gamma_{Mi_1}$  and  $\gamma_{Li_1}$ , respectively. The quantum master equation of the total system is then given by [8]

$$\begin{aligned} \frac{d\rho(t)}{dt} &= -\frac{i}{\hbar}[H_{int}, \rho(t)] \\ &+ \sum_{i=S_1, ML_1, MR_1, LL_1, LR_1} \frac{\gamma_i}{2} (2R_i\rho(t)R_i^\dagger - R_i^\dagger R_i\rho(t) - \rho(t)R_i^\dagger R_i) \\ &+ \sum_{i=ML_2, LL_3, LL_2, MR_2, LR_3, LR_2} \frac{\Gamma_i}{2} (2S_i\rho(t)S_i^\dagger - S_i^\dagger S_i\rho(t) - \rho(t)S_i^\dagger S_i), \end{aligned} \quad (4)$$

where the interaction Hamiltonian is given by  $H_{int}$ . Let the  $(i, i)$  and  $(j, j)$  elements of  $\rho(t)$  be the probabilities of the two states that are transformable between each other via an optical near-field interaction denoted by  $U_{ij}$ . Then, the  $(i, j)$  and  $(j, i)$  elements of the interaction Hamiltonian are given by  $U_{ij}$ . The matrices  $R_i$  ( $i = S_1, ML_1, MR_1, LL_1, LR_1$ ) are annihilation operators that respectively annihilate excitations in  $S_1, ML_1, MR_1, LL_1$  and  $LR_1$  via radiative relaxations. The matrices  $R_i^\dagger$  ( $i = S_1, ML_1, MR_1, LL_1, LR_1$ ) are creation operators given by the transposes of the matrices of  $R_i$ . The radiative decay times  $\gamma_{LL_1}^{-1} = \gamma_{LR_1}^{-1} = 1$  ns,  $\gamma_{ML_1}^{-1} = \gamma_{MR_1}^{-1} = 2^{\frac{3}{2}} \times 1 \sim 2.83$  ns and  $\gamma_{S_1}^{-1} = 2^3 \times 1 \sim 8$  ns are inversely proportional to the volumes of the  $\mathbf{QD}_S$  [9]. The matrices  $S_i$  ( $i = ML_2, LL_3, LL_2, MR_2, LR_3, LR_2$ ) are annihilation

operators that respectively annihilate excitations in  $ML_2$ ,  $LL_3$ ,  $LL_2$ ,  $MR_2$ ,  $LR_3$  and  $LR_2$  via sublevel relaxations  $\Gamma_i$  and populate excitations in the corresponding lower energy levels. The diagram shown in Fig. 1(c) schematically summarises the state transitions.

When there are no state-filling induced at  $LL_1$  and  $LR_1$ , the sublevel relaxations are assumed to be equally fast,  $\Gamma_i = 10$  ps. On the other hand, when control lights are irradiated to induce state-filling at  $LL_1$  and/or  $LR_1$ , we have to consider a multi-excitation system in order to calculate the exact dynamics of the system. Another way of describing the effect of state-filling is that the sublevel relaxation time increases, for example by a factor of 10, that is,  $\Gamma_{LL_2}^{-1} = \Gamma_{LR_2}^{-1} = 10 \times 10$  ps. The validity of such an approach has been verified in Ref. [10].

## References

- [1] Xu, Z. Y., Lu, Z. D., Yang, X. P., Yuan, Z. L., Zheng, B. Z., Xu, J. Z., Ge, W. K., Wang, Y., Wang, J. & Chang, L. L. Carrier relaxation and thermal activation of localized excitons in self-organized InAs multilayers grown on GaAs substrates. *Phys. Rev. B* **54**, 11528-11531 (1996).
- [2] Heitz, R., Mukhametzhanov, I., Chen, P. & Madhukar A. Excitation transfer in self-organized asymmetric quantum dot pairs. *Phys. Rev. B* **58**, R10151–R10154 (1998).
- [3] Mazur, Yu. I., Wang, Zh. M., Tarasov, G. G., Xiao, M., Salamo, G. J., Tomm, J. W., Talalaev, V. & Kissel, H. Interdot carrier transfer in asymmetric bilayer InAs/GaAs quantum dot structures. *Appl. Phys. Lett.* **86**, 063102 1–3 (2005).
- [4] Kagan, C. R., Murray, C. B., Nirmal, M. & Bawendi M. G. Electronic Energy Transfer in CdSe Quantum Dot Solids. *Phys. Rev. Lett.* **76**, 1517-1520 (1996).
- [5] Pistol, C., Dwyer, C. & Lebeck, A. R. Nanoscale Optical Computing Using Resonance Energy Transfer Logic. *IEEE Micro* **28**, 7–18 (2008).
- [6] Ohtsu, M., Kobayashi, K., Kawazoe, T., Yatsui, T. & Naruse, M. *Principles of Nanophotonics*. Taylor and Francis (2008).
- [7] Naruse, M., Hori, H., Kobayashi, K. & Ohtsu, M. Tamper resistance in optical excitation transfer based on optical near-field interactions. *Opt. Lett.* **32**, 1761–1763 (2007).
- [8] Carmichael, H. J. *Statistical Methods in Quantum Optics I*. Springer-Verlag (1999).

- [9] Itoh, T., Furumiya, M., Ikehara, T. & Gourdon, C. Size-dependent radiative decay time of confined excitons in CuCl microcrystals. *Solid State Commun.* **73**, 271–274 (1990).
- [10] Naruse, M., Aono, M., Kim, S. -J., Kawazoe, T., Nomura, W., Hori, H., Hara, M. & Ohtsu M. Spatiotemporal dynamics in optical energy transfer on the nanoscale and its application to constraint satisfaction problems, *Physical Review B*, **86**, 125407 1–10 (2012).
